# Supplementary material for: The Tomato Hoffman’s Anthocyaninless Gene Encodes a bHLH Transcription Factor Involved in Anthocyanin Biosynthesis That Is Developmentally Regulated and Induced by Low Temperatures
Source: PubMed Central journal article supplement (PMC4778906; doi:10.1371/journal.pone.0151067), 2016-03-04
Supplement: pone.0151067.s013.pdf [file pone.0151067.s013.pdf]

**S7 Table. Primer used in this study.**

| Primer name                                                    | Sequence (5'-3')        |                          |
|----------------------------------------------------------------|-------------------------|--------------------------|
|                                                                | Forward primer          | Reverse primer           |
| For map-based cloning                                          |                         |                          |
| CAPS1                                                          | CTTAACTTGCCTTAGCCC      | CTCCGCAGATAGACCTCA       |
| CAPS2                                                          | GCCTCGATGTCCAAAGGTGTAGC | TGGCGTGAGGTTGTCCTGAGTG   |
| CAPS3                                                          | GTGAGGATGGGAATAAGGAGAC  | ATAAAGAATGCTAACCCAGGAGA  |
| CAPS4                                                          | AGCGTGAAAGTTTAGGGT      | AGCGAGCAGATGGTGATT       |
| CAPS5                                                          | CGAAATTATCGGTCCAAA      | AACAAGTCCCGTTATCAA       |
| The other molecular markers taken from Tomato-EXPEN 2000 [1] . |                         |                          |
| For qPCR                                                       |                         |                          |
| <i>ACTIN</i>                                                   | GGGATGGAGAAGTTTGGTGGTGG | CTTCGACCAAGGGATGGTGTAGC  |
| <i>AH</i>                                                      | CTAAGAGTGCCCGCATAACAGAC | ATCCGAAGTGGAGTGCTCAGATA  |
| <i>PAL</i> *                                                   | GGAATTGCAGGGTTGCCACTTT  | AAGGCCGCGTTGCCTAAAGAAG   |
| <i>CHS1</i> *                                                  | TGGTCACCGTGGAGGAGTATC   | GATCGTAGCTGGACCCTCTGC    |
| <i>AAC</i> *                                                   | CCCTCCAGTACCACCAGAAA    | TTCAGACAACCTTCCAGCAA     |
| <i>GST</i> *                                                   | TGGGACACAACAGTGATTTGA   | TGGCTTAGATCGGCTAAGGA     |
| <i>5GT</i> *                                                   | GTGGCATTTCCTCATTGGAC    | TCATCACTCTCAACCACACCA    |
| <i>DFR</i>                                                     | GACAGAACGAAGTAATCAAAC   | TAAAAGAGAAGAATAGCCAAACG  |
| <i>CHI</i>                                                     | GAAGCAGTGCTCGATTCCATAA  | GTTTTTCACAAACCAACAGTTCT  |
| <i>F3'5'H</i>                                                  | CCCTCAACGCCACTAAATCTCC  | TCACTATTCCCATCCTTGTCCCCG |
| <i>CHS2</i>                                                    | GGCCGACTACCAACTACCAA    | GTCCCACCAGCAAAGCAACCTT   |
| <i>4CL</i> *                                                   | GCATTGGAGAATGGTGTGAA    | CTCATCGGCCTGAATCAACT     |
| <i>F3H</i>                                                     | GTGAAAAGTTGATGGATTTGGC  | GTAATGGTTCCTGGATCGGTGTGT |
| <i>ANS</i>                                                     | GAAGTAGCACTTGGCGTGCAG   | TTGCAAGCCAGGCACCATA      |
| <i>CHI-LIKE</i>                                                | GCGATAGAAGGTAAGGA       | AGCCAAAGAAGAAATAGTTGT    |
| <i>RT</i>                                                      | CTGGCAATGCAAACAGAGTGA   | TCGACTTGCGGAAGAGTGAGA    |
| <i>Solyc06g049020</i>                                          | GGGCGTTTCCTCATCGTGT     | CTCGCTGTAAATCTCAACCAACA  |

\*Primer sequences taken from previous study [2].

## Reference

1. Fulton TM, Van der Hoeven R, Eannetta NT, Tanksley SD. Identification, analysis, and utilization of conserved ortholog set markers for comparative genomics in higher plants. *Plant cell*. 2002;14(7):1457-67.
2. Povero G, Gonzali S, Bassolino L, Mazzucato A, Perata P. Transcriptional analysis in high-anthocyanin tomatoes reveals synergistic effect of Aft and atv genes. *J Plant Physiol*. 2011;168(3):270-9.
